# Supplementary material for: Combined Methylome and Transcriptome Analyses Reveals Potential Therapeutic Targets for EGFR Wild Type Lung Cancers with Low PD-L1 Expression
Source: MDPI journal article supplement (doi:10.3390/cancers12092496), 2020-09-03

*Supplementary Materials*

## Combined Methylome and Transcriptome Analyses Reveals Potential Therapeutic Targets for EGFR Wild Type Lung Cancers with Low PD-L1 Expression

Weilei Hu, Guosheng Wang, Lonny B. Yarmus and Yuan Wan

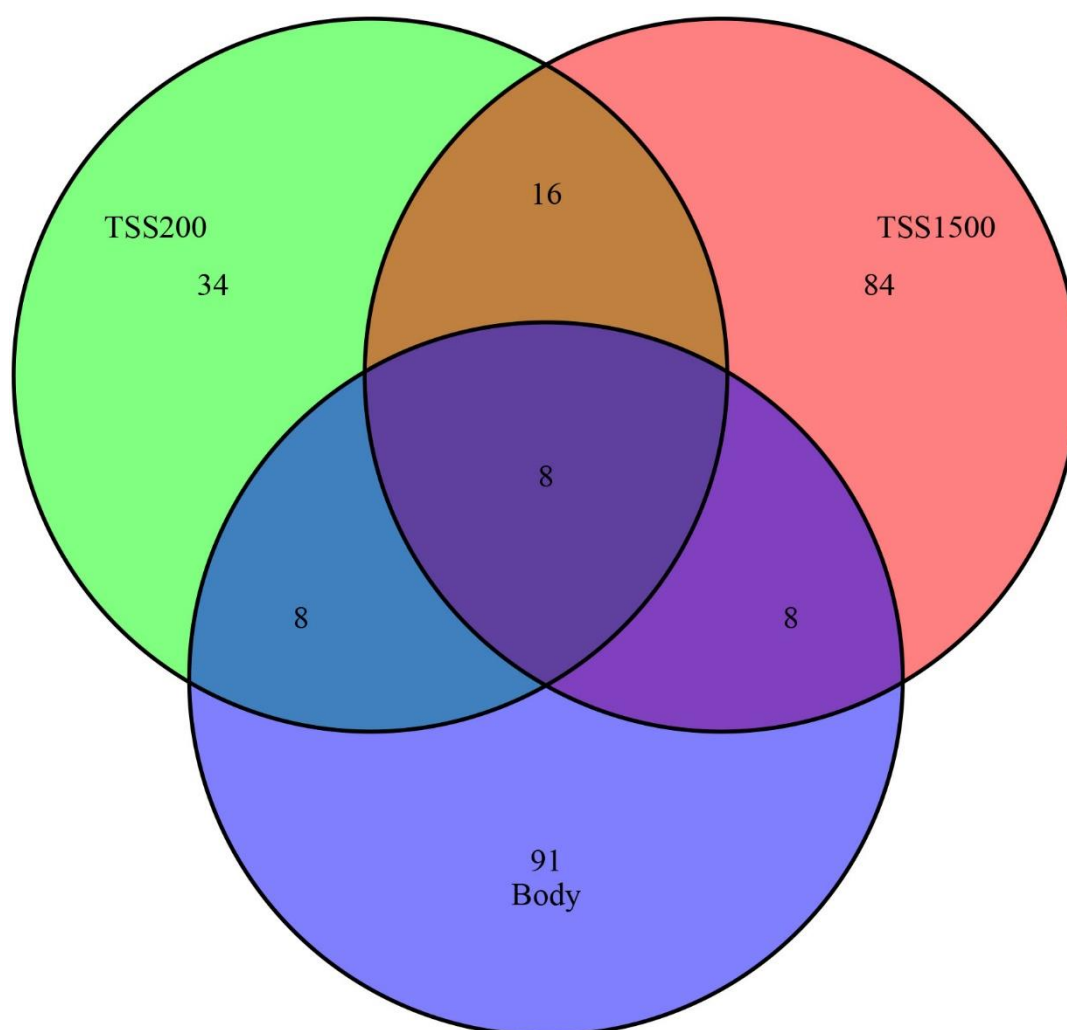

**Figure S1.** Venn mapping showing the intersection of DMEGs in TSS200, TSS1500 and gene body.

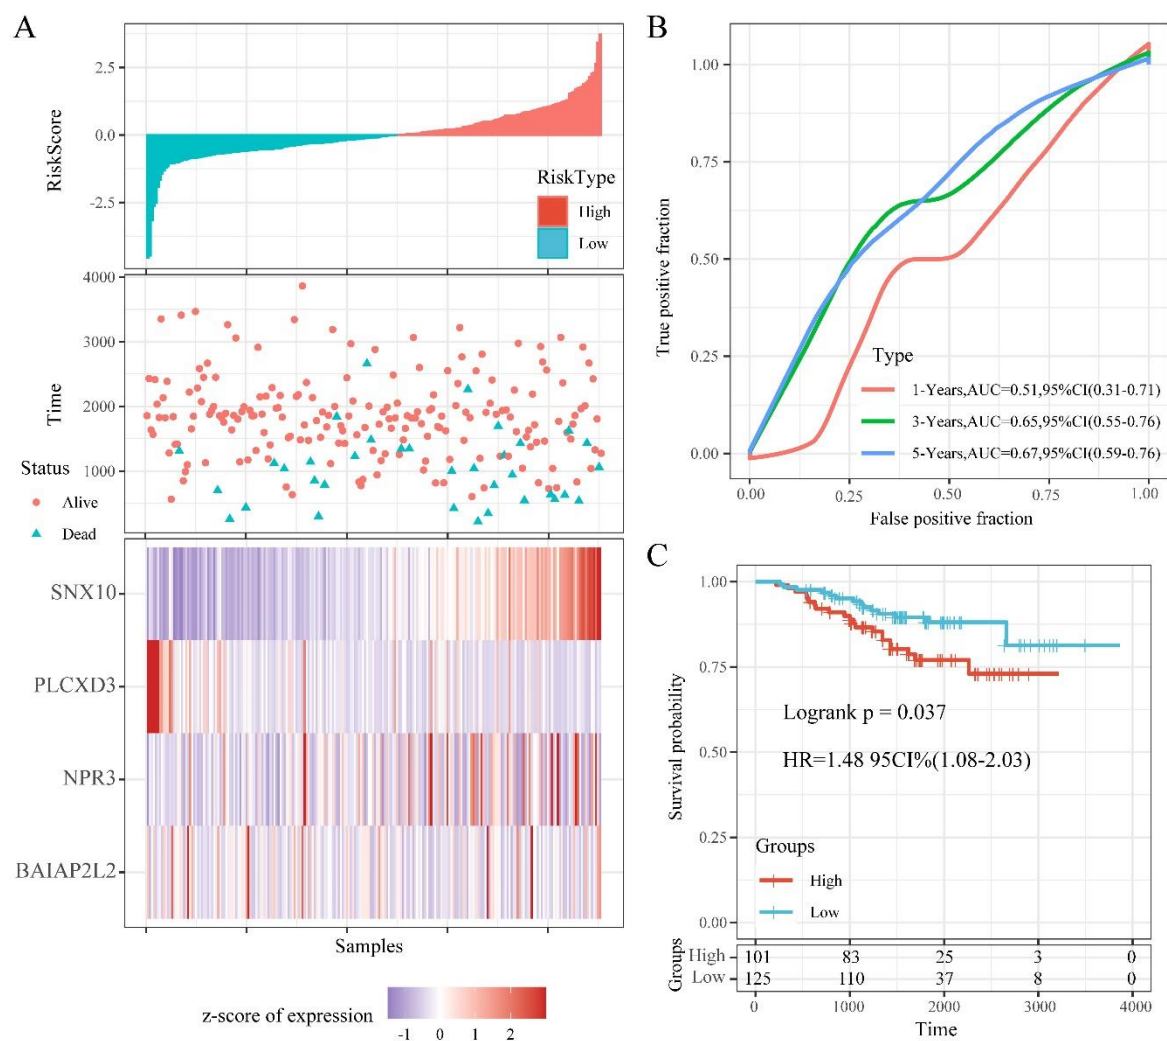

**Figure S2.** The relationship between RiskScore and patient outcome in the validation cohort (from GEO). **(A)** Each patient's RiskScore, survival time and status, and the expression of 4 DMEGs. The horizontal axis represents the samples, and the vertical axis represents RiskScores, OS, and immune-related gene expression, respectively. **(B)** 1-, 3-, and 5-years ROC analysis of prognosis classification for RiskScore. **(C)** KM survival analysis of patients with high RiskScore vs low RiskScore.

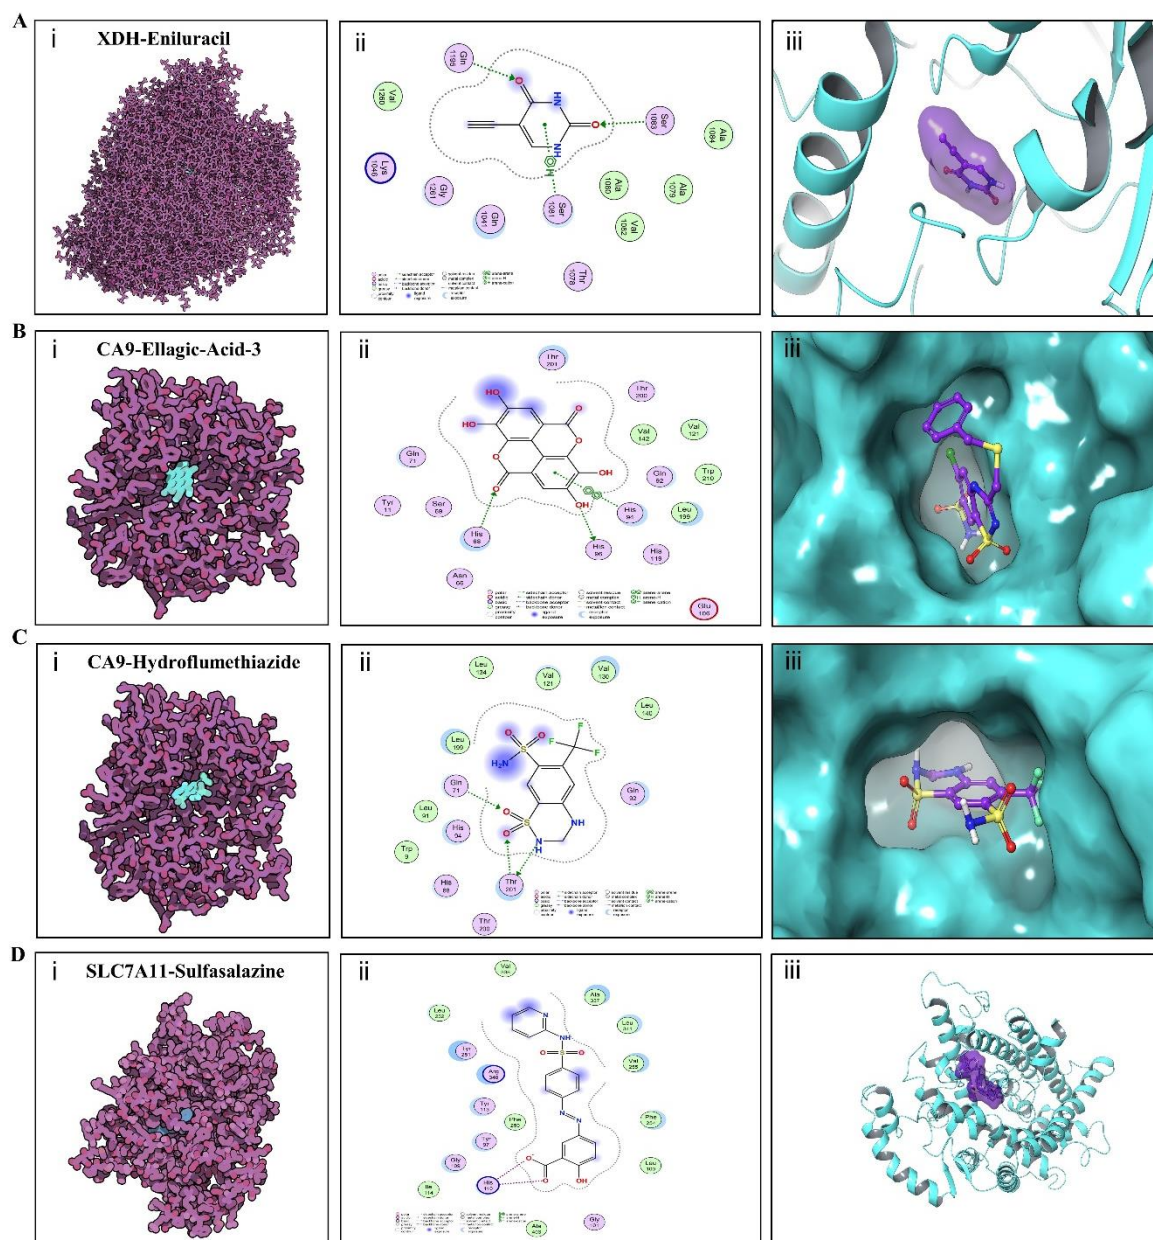

**Figure S3.** Binding mode of screened drugs to their targets by molecular docking. **(A)** Binding mode of XDH-Eniluracil complex. **(B)** Binding mode of CA9-Ellagic-Acid-3 complex. **(C)** Binding mode of CA9-Hydroflumethiazide complex. **(D)** Binding mode of SLC7A11-Sulfasalazine complex. **(i)**, Cartoon representation, overlay of the crystal structures of small molecule compounds and their targets were illustrated by Molecule of the Month feature. **(ii)**, 2D interactions of compounds and their targets. **(iii)** 3D structures of binding interface were showed by PyMOL software.

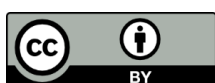

Supplement: s1 [file s1]
